# Supplementary material
Source: publisher figshare collection journal article supplement (https://sage.figshare.com/articles/dataset/_/8283230)
Supplement: Supplementary file 1 [file 15510401]

## Supplementary Data

Supplementary Figure 1. Flow diagram of patients' inclusion

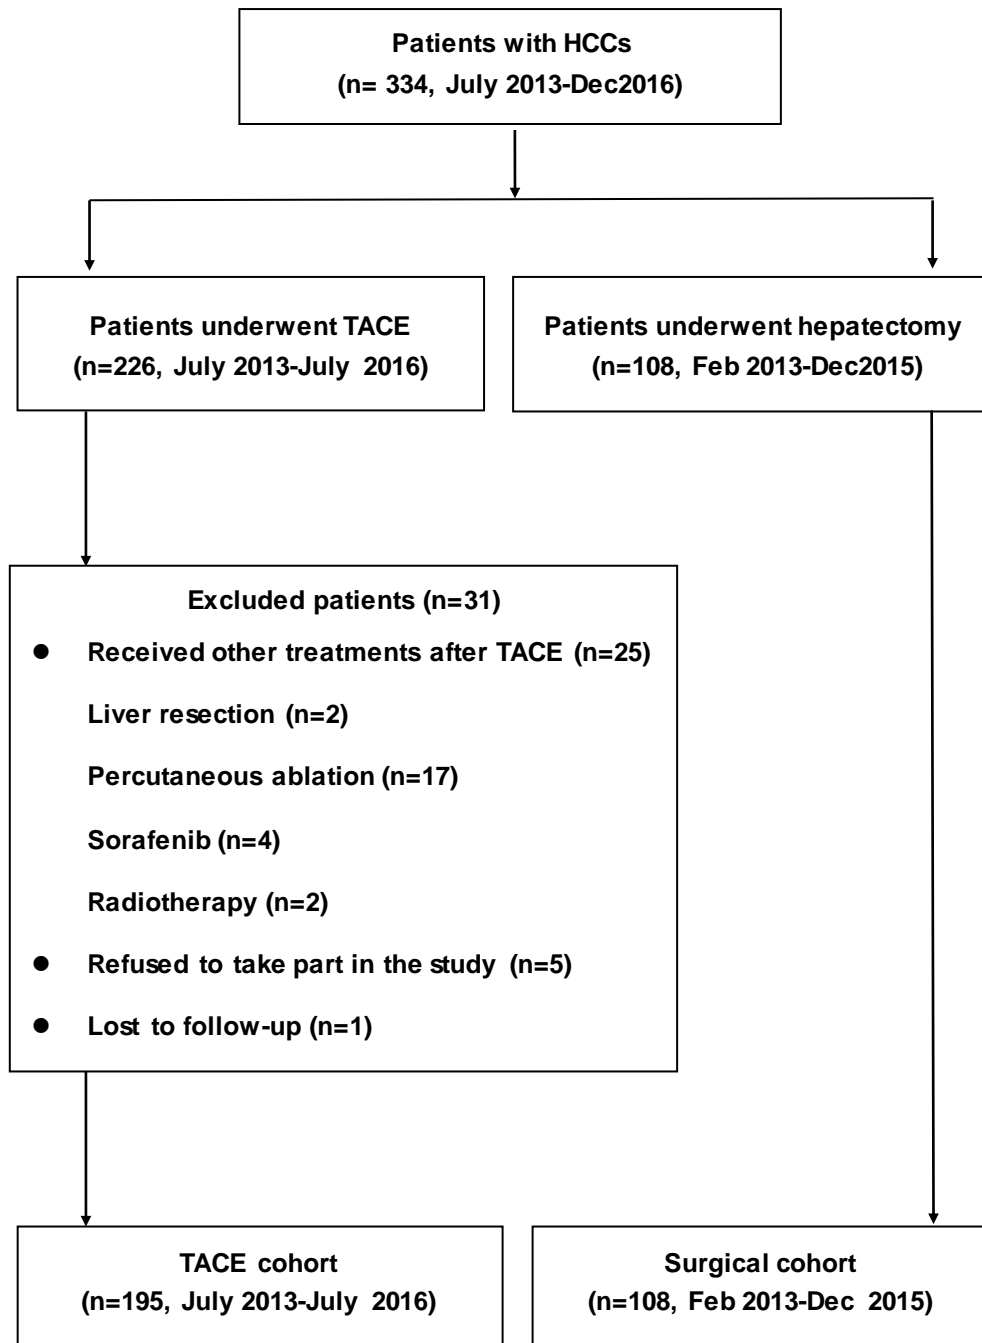

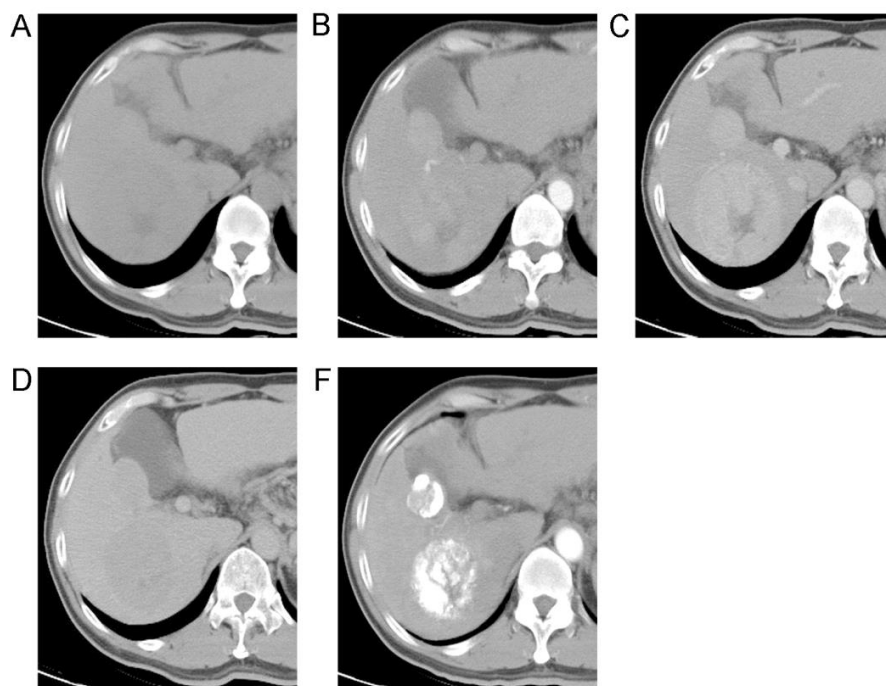

**Supplementary Figure 2. The pattern of tumor enhancement and attenuation on CT scan and the filling of lipiodol in nodules of the patient with multiple HCCs**

Shown are the CT scan images of a 42-year-old male patient with type I HCC who received one session of TACE. Except for the central necrosis region of the tumor, similar patterns of tumor enhancement and attenuation were found in the two tumor nodules. The pattern of lipiodol retained in the tumor was similar to that of tumor enhancement.

A, B, C, D showed the images of the four sequential phases of CT scan, indicating a marked contrast enhancement on the arterial and portal venous phases and washout of contrast medium on the delay phase. F indicated lipiodol retention in tumors one month after TACE.

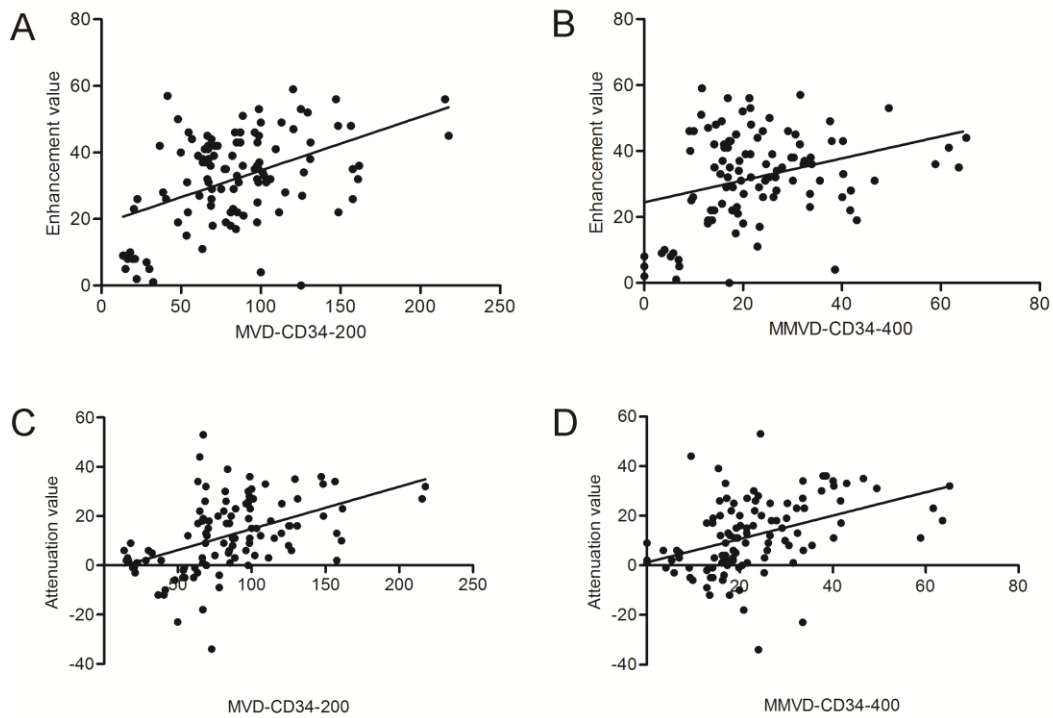

**Supplementary Figure 3. Association of MVD and MMVD with the characteristics of HCC on CT scan**

MVD (A) and MMVD (B) are correlated with tumor enhancement on CT scan, showing Pearson  $r=0.463$  and  $0.313$  as well as  $p<0.0001$  and  $p=0.001$ , respectively.

MVD (C) and MMVD (D) are correlated with tumor attenuation on CT scan, showing Pearson  $r=0.467$  and  $0.416$ , respectively, as well as  $p<0.0001$ .

X: The values of MVD-CD34-200 (A, C) and MMVD-CD34-400 (B, D); Y: Differences in CT values between the pre-contrast phase and the point of peak enhancement (A, B) and between the point of peak enhancement and the delay phase (C, D).

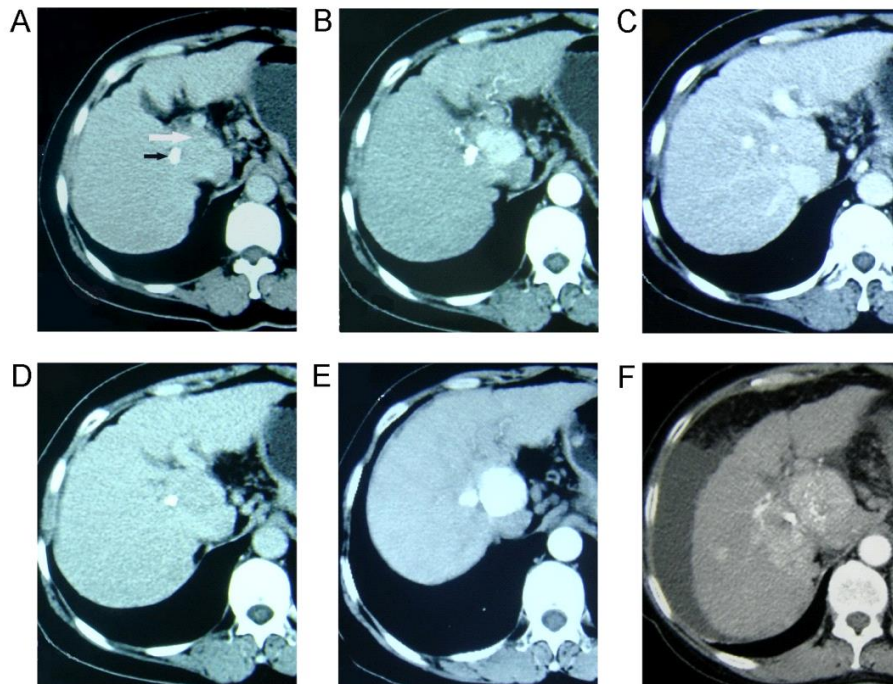

**Supplementary Figure 4. Characteristics of type I HCC on CT scan before and after TACE**

Shown are the CT scan images of a 65-year-old female patient with type I HCC who received one session of TACE. A: Precontrast phase, the white arrow indicates a 2.9 cm  $\times$  2.7 cm tumor in the caudate lobe; the black arrow indicates a 0.9 cm  $\times$  0.8 cm calcification. B: Arterial phase, the tumor was enhanced locally and markedly. C and D: Portal venous and delay phase, the local enhancement were decreased significantly. E: One month after TACE, the tumor was completely filled with lipiodol, suggesting CN of the tumor. F: 6 months after TACE, lipiodol was completely washed out, accompanied with tumor progression and ascites occurrence.

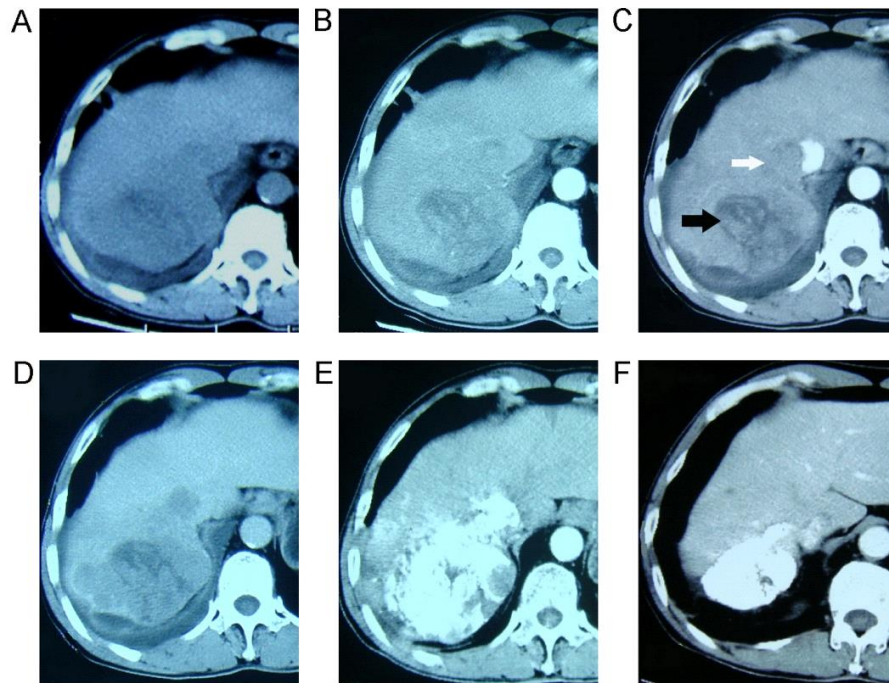

**Supplementary Figure 5. Characteristics of type II HCC on CT scan before and after TACE**

Shown are the CT scan images of a 63-year-old male patient with type II HCC who received one session of TACE. A: Precontrast phase, a 9 cm×8.2 cm tumor located in the right liver. B and C: Arterial and the portal venous phase, the tumor were enhanced locally. D: Delay phase, the tumor was enhanced continually. E: One month after TACE, lipiodol completely retained in the tumor. F: 12 months after TACE, lipiodol retained in the tumor without signs of tumor progression, and the tumor became obviously smaller.

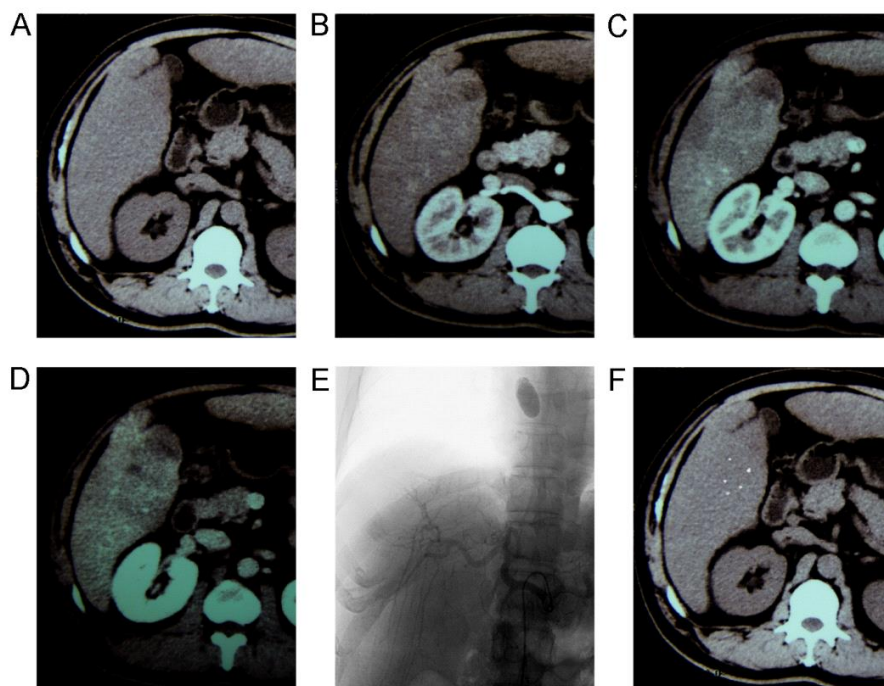

**Supplementary Figure 6. Characteristics of type III HCC on CT scan before and after TACE**

Shown are the CT scan images of a 40-year-old male patient with type III HCC who received one session of TACE. A: Precontrast phase, a 7.2 cm × 5.3 cm tumor was found in the right posterior section without capsulation; B: Arterial phase, the tumor had almost no enhancement. C and D: The tumor had slight changes of CT values in the portal venous and delayed phases. E and F: The tumor had almost no lipiodol retention in the tumor on DSA and 1 month after TACE. The patient died 3 months after the initial TACE due to tumor progression and liver function decompensation.

**Supplementary Table 1.** The baseline characteristics of HCC patients who underwent TACE or liver resection

| Variable           | TACE cohort (n=195)<br>No. of patients (%) | Surgical cohort (n=108)<br>No. of patients (%) |
|--------------------|--------------------------------------------|------------------------------------------------|
| Age, years         |                                            |                                                |
| <50                | 87(44.6)                                   | 51(47.2)                                       |
| ≥50                | 108(55.4)                                  | 57(52.8)                                       |
| Gender             |                                            |                                                |
| male               | 178(91.3)                                  | 91(84.3)                                       |
| female             | 17(8.7)                                    | 17(15.7)                                       |
| Child-Pugh grade   |                                            |                                                |
| A                  | 191(97.9)                                  | 108(100.0)                                     |
| B                  | 4(2.1)                                     | 0(0.0)                                         |
| BCLC stage         |                                            |                                                |
| 0                  | 0(0.0)                                     | 5(4.6)                                         |
| A                  | 30(15.4)                                   | 31(28.7)                                       |
| B                  | 165(84.6)                                  | 72(66.7)                                       |
| HBsAg              |                                            |                                                |
| positive           | 156(80.0)                                  | 51(47.2)                                       |
| negative           | 39(20.0)                                   | 57(52.8)                                       |
| HBeAg              |                                            |                                                |
| positive           | 63(32.3)                                   | 86(79.6)                                       |
| negative           | 132(67.7)                                  | 22(20.4)                                       |
| HBV-DNA load       |                                            |                                                |
| <1x10 <sup>3</sup> | 169(86.7)                                  | 90(83.3)                                       |
| ≥1x10 <sup>3</sup> | 26(13.3)                                   | 16(16.7)                                       |
| TBIL, μmol/L       |                                            |                                                |
| <17.1              | 117(60.0)                                  | 59(54.6)                                       |
| ≥17.1              | 78(40.0)                                   | 49(45.4)                                       |
| Albumin, g/L       |                                            |                                                |
| <35                | 36(18.5)                                   | 12(11.1)                                       |
| ≥35                | 159(81.5)                                  | 96(88.9)                                       |
| ALT, U/L           |                                            |                                                |
| <40                | 92(47.2)                                   | 57(52.8)                                       |
| ≥40                | 103(52.8)                                  | 51(47.2)                                       |
| AST, U/L           |                                            |                                                |
| <40                | 68(34.9)                                   | 55(50.9)                                       |
| ≥40                | 127(65.1)                                  | 53(49.1)                                       |
| AFP, ng/ml         |                                            |                                                |
| <400               | 103(52.8)                                  | 60(55.6)                                       |
| ≥400               | 92(47.2)                                   | 48(44.4)                                       |
| Maximum tumor, cm  |                                            |                                                |
| <5                 | 44(22.6)                                   | 36(33.3)                                       |
| ≥5                 | 151(77.4)                                  | 72(66.7)                                       |
| Tumor number       |                                            |                                                |
| single             | 119(61.0)                                  | 77(71.3)                                       |
| multiple           | 76(39.0)                                   | 31(28.7)                                       |

Categorical variables are presented as numbers and percentages of patients in parentheses.

**Supplementary Table 2. Values measured in the four phases of CT scan in the  
TACE cohort (n=195)**

| No. | A   | B   | C   | D   | Type | No. | A  | B  | C   | D  | Type | No. | A  | B  | C  | D   | Type |
|-----|-----|-----|-----|-----|------|-----|----|----|-----|----|------|-----|----|----|----|-----|------|
| 1   | 54  | 60  | 102 | 81  | I    | 64  | 43 | 54 | 80  | 51 | I    |     | 52 | 45 | 65 | 78  |      |
| 2   | 46  | 61  | 68  | 64  | I    | 65  | 39 | 36 | 74  | 61 | I    | 130 | 22 | 43 | 46 | 46  | II   |
|     | 58  | 67  | 92  | 69  |      |     | 33 | 42 | 68  | 52 |      | 131 | 35 | 47 | 51 | 62  | II   |
| 3   | 44  | 78  | 99  | 87  | I    | 66  | 33 | 71 | 77  | 59 | I    | 132 | 42 | 55 | 42 | 65  | II   |
|     | 49  | 66  | 86  | 75  |      | 67  | 31 | 44 | 48  | 42 | I    | 133 | 24 | 20 | 40 | 45  | II   |
| 4   | 46  | 123 | 96  | 67  | I    | 68  | 50 | 64 | 80  | 77 | I    |     | 35 | 36 | 56 | 66  |      |
| 5   | 43  | 58  | 73  | 66  | I    | 69  | 48 | 72 | 77  | 75 | I    | 134 | 41 | 50 | 70 | 70  | II   |
| 6   | 53  | 83  | 88  | 75  | I    | 70  | 57 | 91 | 92  | 25 | I    | 135 | 54 | 72 | 67 | 84  | II   |
| 7   | 41  | 60  | 93  | 85  | I    |     | 52 | 82 | 76  | 36 |      | 136 | 72 | 81 | 92 | 102 | II   |
| 8   | 42  | 40  | 69  | 51  | I    | 71  | 47 | 45 | 87  | 67 | I    | 137 | 34 | 40 | 50 | 54  | II   |
| 9   | 51  | 79  | 106 | 79  |      |     | 48 | 66 | 69  | 55 |      | 138 | 40 | 40 | 45 | 51  | II   |
|     | 42  | 55  | 87  | 63  | I    |     | 52 | 69 | 75  | 48 |      | 139 | 36 | 18 | 32 | 62  | II   |
| 10  | 51  | 61  | 71  | 67  | I    | 72  | 51 | 46 | 68  | 47 | I    | 140 | 36 | 37 | 45 | 47  | II   |
| 11  | 40  | 52  | 107 | 64  | I    | 73  | 21 | 38 | 29  | 33 | I    | 141 | 58 | 65 | 64 | 71  | II   |
|     | 46  | 54  | 96  | 68  |      | 74  | 15 | 18 | 28  | 23 | I    | 142 | 36 | 55 | 57 | 76  | II   |
|     | 54  | 58  | 88  | 63  |      |     | 19 | 22 | 32  | 18 |      | 143 | 45 | 56 | 58 | 76  | II   |
| 12  | 60  | 60  | 78  | 72  | I    |     | 20 | 21 | 33  | 24 |      |     | 44 | 58 | 79 | 45  |      |
|     | 49  | 62  | 85  | 68  | I    | 75  | 60 | 61 | 95  | 83 | I    | 144 | 43 | 47 | 51 | 54  | II   |
| 13  | 50  | 72  | 83  | 75  | I    |     | 56 | 65 | 94  | 72 |      |     | 42 | 55 | 78 | 45  |      |
|     | 55  | 74  | 89  | 71  |      | 76  | 47 | 88 | 86  | 69 | I    |     | 40 | 56 | 54 | 65  |      |
| 14  | 101 | 142 | 123 | 113 | I    | 77  | 40 | 69 | 80  | 58 | I    | 145 | 46 | 79 | 86 | 105 | II   |
| 15  | 56  | 75  | 89  | 75  | I    | 78  | 49 | 52 | 80  | 71 | I    |     | 42 | 65 | 82 | 88  |      |
|     | 49  | 68  | 85  | 69  |      | 79  | 44 | 53 | 76  | 70 | I    | 146 | 37 | 35 | 68 | 83  | II   |
| 16  | 55  | 59  | 90  | 80  | I    | 80  | 16 | 11 | 26  | 18 | I    | 147 | 44 | 58 | 67 | 93  | II   |
|     | 52  | 62  | 85  | 75  |      |     | 22 | 28 | 36  | 22 |      |     | 42 | 54 | 69 | 88  |      |
| 17  | 59  | 38  | 60  | 44  | I    |     | 28 | 32 | 42  | 36 |      | 148 | 60 | 74 | 79 | 84  | II   |
|     | 54  | 55  | 68  | 52  |      | 81  | 40 | 67 | 75  | 64 | I    | 149 | 47 | 65 | 58 | 86  | II   |
| 18  | 48  | 69  | 94  | 79  | I    |     | 42 | 75 | 84  | 65 |      |     | 45 | 62 | 66 | 78  |      |
| 19  | 45  | 53  | 83  | 75  | I    | 82  | 81 | 89 | 100 | 69 | I    |     | 42 | 68 | 72 | 95  |      |
| 20  | 42  | 81  | 82  | 63  | I    |     | 82 | 82 | 102 | 75 |      | 150 | 35 | 43 | 56 | 68  | II   |
|     | 41  | 82  | 86  | 60  |      |     | 78 | 79 | 98  | 72 |      | 151 | 41 | 48 | 50 | 64  | II   |
| 21  | 32  | 59  | 58  | 58  | I    | 83  | 43 | 53 | 71  | 64 | I    | 152 | 49 | 65 | 59 | 66  | II   |
|     | 35  | 62  | 59  | 54  |      | 84  | 51 | 78 | 92  | 80 | I    | 153 | 42 | 51 | 52 | 75  | II   |
|     | 42  | 58  | 72  | 61  |      | 85  | 57 | 94 | 98  | 88 | I    | 154 | 49 | 76 | 69 | 85  | II   |
| 22  | 46  | 45  | 54  | 49  | I    | 86  | 47 | 63 | 72  | 70 | I    |     | 56 | 68 | 75 | 92  |      |
| 23  | 34  | 69  | 70  | 62  | I    |     | 49 | 62 | 76  | 62 |      | 155 | 40 | 52 | 67 | 74  | II   |
|     | 38  | 52  | 69  | 46  |      |     | 39 | 56 | 88  | 54 |      |     | 45 | 56 | 72 | 88  |      |
| 24  | 34  | 59  | 74  | 64  | I    | 87  | 50 | 59 | 80  | 74 | I    |     | 52 | 62 | 66 | 78  |      |
| 25  | 39  | 65  | 63  | 55  | I    |     | 48 | 52 | 78  | 70 |      | 156 | 47 | 86 | 93 | 95  | II   |
|     | 45  | 68  | 72  | 56  |      |     | 53 | 54 | 74  | 56 |      |     | 49 | 78 | 77 | 98  |      |
|     | 52  | 76  | 78  | 62  |      | 88  | 58 | 81 | 94  | 83 | I    |     | 45 | 75 | 75 | 88  |      |
| 26  | 53  | 67  | 71  | 54  | I    | 89  | 40 | 43 | 73  | 66 | I    | 157 | 39 | 46 | 68 | 68  | II   |
|     | 63  | 69  | 78  | 56  |      | 90  | 38 | 57 | 68  | 42 | I    | 158 | 44 | 59 | 77 | 92  | II   |
| 27  | 48  | 57  | 98  | 75  | I    | 91  | 49 | 66 | 97  | 71 | I    | 159 | 48 | 49 | 62 | 79  | II   |
|     | 55  | 65  | 87  | 66  |      | 92  | 42 | 55 | 106 | 74 | I    | 160 | 22 | 41 | 37 | 43  | II   |
| 28  | 60  | 62  | 88  | 60  | I    | 93  | 57 | 75 | 84  | 73 | I    | 161 | 38 | 64 | 78 | 78  | II   |
|     | 62  | 68  | 65  | 75  |      | 94  | 35 | 29 | 63  | 57 | I    | 162 | 38 | 45 | 55 | 60  | II   |
|     | 56  | 69  | 82  | 72  |      | 95  | 46 | 60 | 82  | 75 | I    | 163 | 48 | 55 | 60 | 67  | II   |
| 29  | 45  | 52  | 63  | 47  | I    |     | 42 | 58 | 88  | 65 |      |     | 42 | 52 | 62 | 72  |      |
| 30  | 54  | 83  | 93  | 80  | I    | 96  | 55 | 38 | 71  | 31 | I    | 164 | 40 | 46 | 51 | 53  | II   |
| 31  | 45  | 67  | 85  | 71  | I    | 97  | 30 | 43 | 59  | 52 | I    | 165 | 36 | 40 | 41 | 67  | II   |
| 32  | 35  | 35  | 55  | 33  | I    |     | 32 | 48 | 75  | 49 |      | 166 | 51 | 52 | 78 | 84  | II   |
|     | 36  | 42  | 58  | 36  |      |     | 45 | 56 | 69  | 56 |      |     | 45 | 56 | 75 | 82  |      |
|     | 38  | 44  | 62  | 42  |      | 98  | 35 | 39 | 57  | 54 | I    | 167 | 42 | 59 | 72 | 73  | II   |

|    |    |    |    |    |   |     |     |     |     |     |    |     |    |    |    |    |     |
|----|----|----|----|----|---|-----|-----|-----|-----|-----|----|-----|----|----|----|----|-----|
| 33 | 48 | 84 | 92 | 78 | I | 99  | 30  | 43  | 108 | 65  | I  |     | 41 | 52 | 75 | 75 |     |
| 34 | 46 | 77 | 89 | 80 | I | 100 | 37  | 49  | 32  | 34  | I  |     | 38 | 48 | 78 | 89 |     |
|    | 42 | 72 | 86 | 75 |   |     | 38  | 56  | 45  | 32  |    | 168 | 43 | 51 | 59 | 70 | II  |
|    | 41 | 68 | 78 | 68 |   |     | 36  | 52  | 38  | 31  |    | 169 | 46 | 71 | 59 | 75 | II  |
| 35 | 57 | 72 | 74 | 48 | I | 101 | 44  | 69  | 73  | 66  | I  | 170 | 56 | 75 | 76 | 83 | II  |
| 36 | 49 | 56 | 94 | 81 | I | 102 | 48  | 79  | 93  | 59  | I  | 171 | 40 | 49 | 62 | 68 | II  |
| 37 | 64 | 50 | 76 | 66 | I | 103 | 55  | 50  | 64  | 37  | I  |     | 45 | 62 | 78 | 88 |     |
|    | 58 | 50 | 78 | 55 |   | 104 | 54  | 86  | 100 | 67  | I  |     | 46 | 56 | 72 | 92 |     |
|    | 52 | 59 | 82 | 59 |   | 105 | 48  | 67  | 74  | 54  | I  | 172 | 49 | 68 | 63 | 69 | II  |
| 38 | 49 | 60 | 70 | 69 | I | 106 | 47  | 84  | 91  | 71  | I  |     | 45 | 75 | 75 | 88 |     |
|    | 44 | 58 | 76 | 66 |   | 107 | 51  | 64  | 87  | 64  | I  | 173 | 52 | 68 | 64 | 73 | II  |
|    | 45 | 59 | 78 | 58 |   |     | 58  | 62  | 92  | 65  |    | 174 | 54 | 87 | 89 | 90 | II  |
| 39 | 28 | 36 | 26 | 19 | I | 108 | 50  | 58  | 49  | 28  | I  | 175 | 56 | 51 | 77 | 81 | II  |
|    | 26 | 38 | 46 | 25 |   | 109 | 41  | 46  | 65  | 55  | I  | 176 | 27 | 41 | 40 | 63 | II  |
| 40 | 45 | 69 | 69 | 62 | I |     | 46  | 52  | 72  | 59  |    | 177 | 48 | 69 | 70 | 77 | II  |
| 41 | 53 | 64 | 79 | 71 | I |     | 49  | 58  | 78  | 68  |    |     | 45 | 75 | 78 | 86 |     |
| 42 | 42 | 57 | 65 | 60 | I | 110 | 45  | 81  | 109 | 83  | I  |     | 43 | 66 | 72 | 82 |     |
| 43 | 39 | 64 | 75 | 65 | I |     | 49  | 68  | 98  | 78  |    | 178 | 54 | 55 | 90 | 93 | II  |
|    | 41 | 62 | 76 | 56 |   |     | 52  | 66  | 89  | 56  |    |     | 52 | 59 | 88 | 89 |     |
|    | 44 | 56 | 85 | 64 |   | 111 | 44  | 55  | 72  | 69  | I  |     | 42 | 56 | 82 | 98 |     |
| 44 | 46 | 65 | 84 | 69 | I | 112 | 28  | 44  | 114 | 87  | I  | 179 | 41 | 49 | 73 | 86 | II  |
|    | 42 | 62 | 78 | 52 |   | 113 | 54  | 75  | 117 | 79  | I  | 180 | 42 | 39 | 73 | 89 | II  |
| 45 | 41 | 33 | 60 | 49 | I |     | 52  | 72  | 108 | 75  |    |     | 41 | 46 | 68 | 88 |     |
|    | 46 | 52 | 48 | 47 |   | 114 | 37  | 35  | 56  | 49  | I  | 181 | 42 | 41 | 44 | 47 | III |
|    | 38 | 42 | 44 | 39 |   |     | 35  | 39  | 52  | 44  |    | 182 | 31 | 29 | 25 | 27 | III |
| 46 | 53 | 53 | 85 | 71 | I | 115 | 49  | 71  | 81  | 65  | I  | 183 | 31 | 36 | 35 | 26 | III |
| 47 | 43 | 56 | 73 | 64 | I | 116 | 44  | 55  | 83  | 72  | I  | 184 | 32 | 32 | 26 | 35 | III |
| 48 | 44 | 34 | 58 | 55 | I |     | 41  | 59  | 89  | 70  |    | 185 | 39 | 34 | 48 | 37 | III |
| 49 | 27 | 61 | 95 | 82 | I | 117 | 46  | 88  | 96  | 77  | I  |     | 42 | 44 | 46 | 58 |     |
| 50 | 41 | 61 | 71 | 70 | I |     | 44  | 82  | 92  | 66  |    |     | 40 | 48 | 46 | 40 |     |
| 51 | 45 | 39 | 67 | 59 | I | 118 | 47  | 56  | 73  | 74  | II | 186 | 60 | 70 | 63 | 64 | III |
| 52 | 30 | 31 | 70 | 69 | I | 119 | 36  | 42  | 68  | 70  | II | 187 | 33 | 28 | 25 | 33 | III |
| 53 | 51 | 59 | 66 | 56 | I | 120 | 41  | 61  | 54  | 71  | II |     | 36 | 32 | 36 | 40 |     |
| 54 | 51 | 62 | 82 | 68 | I | 121 | 40  | 42  | 43  | 58  | II |     | 31 | 33 | 36 | 39 |     |
| 55 | 52 | 88 | 94 | 65 | I |     | 38  | 44  | 69  | 52  |    | 188 | 49 | 59 | 58 | 55 | III |
| 56 | 41 | 46 | 65 | 57 | I |     | 44  | 45  | 65  | 55  |    |     | 52 | 58 | 60 | 56 |     |
|    | 46 | 52 | 72 | 62 |   | 122 | 27  | 33  | 31  | 45  | II | 189 | 54 | 61 | 66 | 60 | III |
|    | 52 | 55 | 86 | 72 |   | 123 | 84  | 103 | 98  | 108 | II |     | 56 | 58 | 62 | 60 |     |
| 57 | 51 | 79 | 86 | 67 | I | 124 | 63  | 82  | 94  | 124 | II |     | 52 | 60 | 56 | 57 |     |
|    | 45 | 71 | 88 | 62 |   |     | 55  | 78  | 85  | 98  |    | 190 | 26 | 29 | 34 | 34 | III |
|    | 48 | 65 | 78 | 59 |   |     | 65  | 82  | 88  | 103 |    | 191 | 24 | 25 | 27 | 25 | III |
| 58 | 48 | 58 | 86 | 85 | I | 125 | 134 | 144 | 162 | 266 | II |     | 29 | 32 | 35 | 36 |     |
| 59 | 54 | 74 | 83 | 72 | I | 126 | 31  | 46  | 70  | 74  | II | 192 | 28 | 32 | 33 | 31 | III |
| 60 | 41 | 49 | 87 | 60 | I |     | 35  | 52  | 68  | 79  |    |     | 29 | 33 | 35 | 33 |     |
| 61 | 59 | 76 | 85 | 78 | I | 127 | 22  | 37  | 34  | 46  | II | 193 | 52 | 48 | 51 | 50 | III |
| 62 | 65 | 71 | 89 | 75 | I |     | 25  | 39  | 42  | 66  |    | 194 | 27 | 21 | 27 | 25 | III |
|    | 62 | 78 | 92 | 71 |   | 128 | 47  | 59  | 69  | 74  | II |     | 28 | 28 | 29 | 26 |     |
| 63 | 31 | 18 | 79 | 76 | I | 129 | 46  | 40  | 46  | 65  | II | 195 | 41 | 39 | 41 | 43 | III |

**Notes:** In the two cohorts, 107 patients with multifocal tumors ( total 269 nodules), had great similarity pattern of enhancement and attenuation, with homogeneity of 91.6% (98 of 107 patients , Supplementary Figure 2). Thus, the CT-based prognostic model was mainly determined by the characteristics of the largest nodule in a patient with multiple HCCs.

A, B, C, D showed the four sequential phases of CT scan



A, B, C, D showed the four sequential phases of CT scan

## **Supplementary Patients and Methods**

### **1. MVD and MVDD assessed by CD34**

In the surgical cohort, microvessel density (MVD) and the maximum diameter of the lumen microvessels (MMVD) were evaluated by immunohistochemical (IHC) staining of CD34 using the methods of Weidner et al and Poon et al<sup>38,39</sup> on the surgical specimens.

Immediately after resection, the central area of the tumor, the areas adjacent to the margin of the tumor, and the adjacent nontumorous liver tissues were collected, sliced to 4 mm thick sections, fixed with formalin, and embedded with paraffin wax. After antigen retrieval using microwave treatment with citrate buffer at a pH of 6.0 for 2 minutes, the section was stained with a monoclonal anti-CD34 antibody (Immunotech, DAKO) at 1/200 dilution to identify the vessels and to evaluate the MVD and the maximum diameter of the lumen microvessels (MMVD).

MVD was assessed independently by two pathologists using the counting method as recommended by Weidner et al and Poon et al. Briefly, the tumorous and non- tumorous tissue sections were scanned at low magnification (40× and 100×) to find the areas that showed the most intense vascularization (hot spots). 5 to 10 fields at 400×magnification (depending on the size of the section) of each section were chosen and captured by an HV-C20A CCD camera (Hitachi, Japan) coupled to a Leica DM-RXA2 microscope (Leica). The mean value of the counted 5-10 fields of the two observers was considered as the MVD of an individual tumor.

MMVD in HCC was defined as the maximum diameter of the microvessel in which the diameter of a lumen could be measured at 400×magnification by CD34

IHC staining. The mean value of the counted 5 -10 fields of the two observers was considered as the MMVD of an individual tumor.

## **2. Follow-up**

The patients who received TACE treatment were followed-up one month after TACE, and then once every 2 months within the first year and once every 3 months thereafter. The follow-up program at each visit included a detailed history and physical examination, serum AFP and liver function tests, HBV immunological indexes and an abdominal ultrasound. A contrast-enhanced CT was performed 1 month after each TACE and then once every 3 or 4 months. Tumor with lipiodol diffusion or with new enhancement areas on CT scan during the follow-up was defined as tumor progression according to the criteria of mRECIST and recorded in detail. Extrahepatic metastasis was diagnosed with CT, MRI, positron emission tomography (PET) or bone scintigraphy.

The endpoints of this study were time to progression (TTP) and overall survival (OS) after TACE. TTP was defined as the interval between the first session of TACE and tumor progression assessed with mRECIST criteria, with lipiodol diffusion or appearance of new enhancement areas in the tumor on CT scan. OS was defined as the interval between the first session of TACE and patient's death or last follow-up.

Patients who received hepatectomy were followed-up one month after discharge

from the hospital, and then once every 2 months within the first 2 years and once every 3 months thereafter. They underwent similar examinations to patients who were treated with TACE as mentioned above. A contrast-enhanced CT/MRI was performed once every 3-6 months or earlier when tumor recurrence was clinically suspected. The diagnostic criterion for tumor recurrence was the appearance of new lesions with the typical radiological features of HCC on two imaging studies, regardless elevation of serum AFP level.
